# Supplementary material
Source: PubMed Central journal article supplement (PMC5685879)

279 **Supplemental Table 1.** Incidence of non-hematologic toxicities (highest grade  
 280 per patient), N=40

281

| Toxicity       | Grade    |        |   |
|----------------|----------|--------|---|
|                | 1-2      | 3      | 4 |
| Diarrhea       | 21 (53%) | 1 (3%) | 0 |
| Fatigue        | 14 (35%) | 2 (5%) | 0 |
| Nausea         | 5 (13%)  | 0      | 0 |
| Rash/Acne      | 28 (70%) | 2 (5%) | 0 |
| Hypomagnesemia | 6 (15%)  | 0      | 0 |
| Keratitis      | 0        | 1 (3%) | 0 |

282

283

284 **FIGURE LEGENDS**

285

286 **Supplemental Figure 1.** Kaplan-Meier curves for overall survival (A) and  
287 progression-free survival (B). The dashed lines depict the 95% confidence  
288 interval.

289

1 **Supplemental Table 1.** Incidence of non-hematologic toxicities (highest grade  
 2 per patient), N=40

3

| Toxicity       | Grade    |        |   |
|----------------|----------|--------|---|
|                | 1-2      | 3      | 4 |
| Diarrhea       | 21 (53%) | 1 (3%) | 0 |
| Fatigue        | 14 (35%) | 2 (5%) | 0 |
| Nausea         | 5 (13%)  | 0      | 0 |
| Rash/Acne      | 28 (70%) | 2 (5%) | 0 |
| Hypomagnesemia | 6 (15%)  | 0      | 0 |
| Keratitis      | 0        | 1 (3%) | 0 |

4

5

# Overall Survival

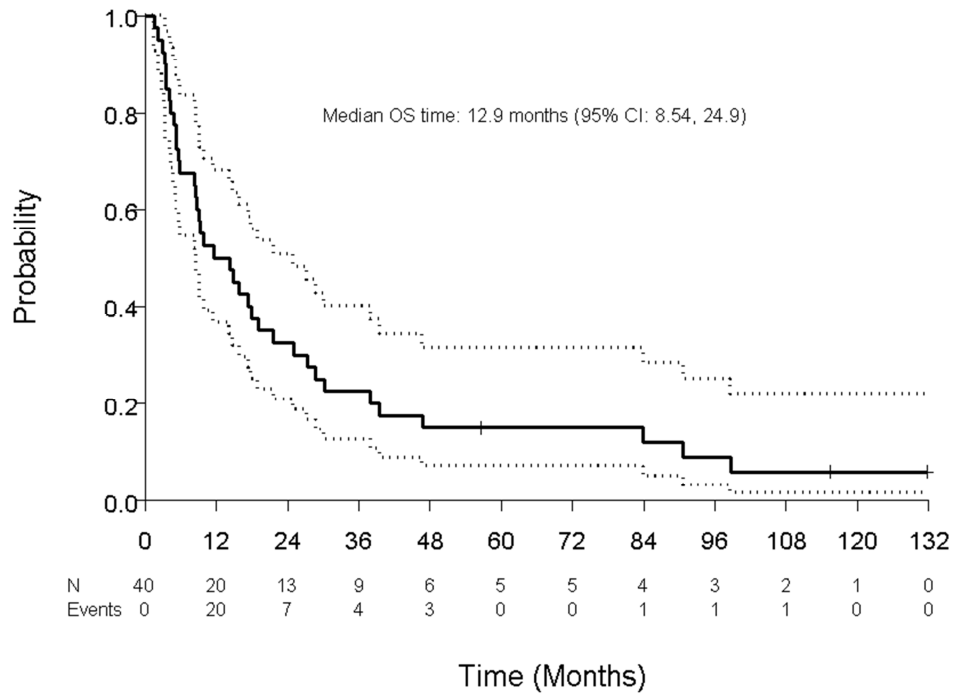

# Progression Free Survival

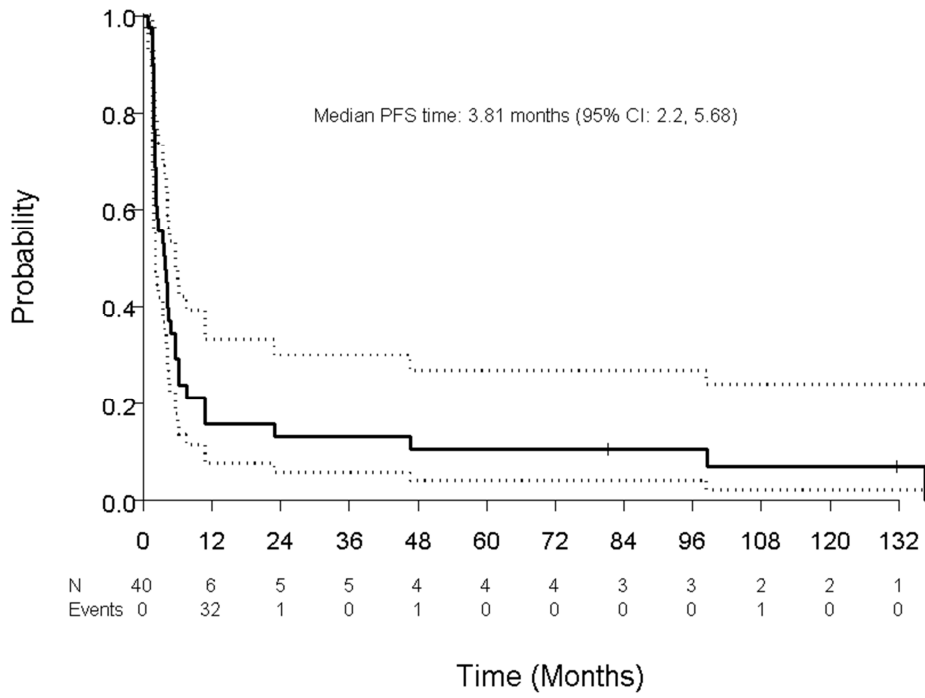

Supplement: NIHMS909380-supplement-supplement_1.pdf [file NIHMS909380-supplement-supplement_1.pdf]
